# Supplementary material for: LncRNA NKX2‐1‐AS1 promotes tumor progression and angiogenesis via upregulation of SERPINE1 expression and activation of the VEGFR‐2 signaling pathway in gastric cancer
Source: PubMed Central journal article supplement (PMC8024734; doi:10.1002/1878-0261.12911), 2021-02-13
Supplement: MOL2-15-1234-s001.pdf [file MOL2-15-1234-s001.pdf]

**Table S1.** Primers and oligonucleotides sequences used in this study

| Name                       | Sequence 5'-3'                                                  |
|----------------------------|-----------------------------------------------------------------|
| NKX2-1-AS1-forward         | ACGCCGATCTTGTGGATGT                                             |
| NKX2-1-AS1-reverse         | CCTCTGGTGGCTGCCTAAAA                                            |
| NKX2-1-AS1-shRNA-1-forward | CCGGGCGTAAGCGCTAAAGCAACAACCTCGAGT<br>TGTTGCTTTAGCGCTTACGCTTTTTG |
| NKX2-1-AS1-shRNA-1-reverse | AATTCAAAAAGCGTAAGCGCTAAAGCAACAAC<br>TCGAGTTGTTGCTTTAGCGCTTACGC  |
| NKX2-1-AS1-shRNA-2-forward | CCGGTAGAAGCCTACATCTTGCCCGCTCGAGCG<br>GGCAAGATGTAGGCTTCTATTTTTG  |
| NKX2-1-AS1-shRNA-2-reverse | AATTCAAAAATAGAAGCCTACATCTTGCCCGCT<br>CGAGCGGGCAAGATGTAGGCTTCTA  |
| NKX2-1-AS1-FISH probe      | GGAGTCGTGTGCTTTGGACT                                            |
| SERPINE1-forward           | GCAACGTGGTTTTCTCACCC                                            |
| SERPINE1-reverse           | CTCTAGGGGCTTCCTGAGGT                                            |
| miR-145-5p-forward         | CTCACGGTCCAGTTTTCCCA                                            |
| miR-145-5p -reverse        | ACCTCAAGAACAGTATTTCCAGG                                         |
| U6 snRNA-forward           | CTCGCTTCGGCAGCACA                                               |
| U6 snRNA-reverse           | AACGCTTCACGAATTTGCGT                                            |
| GAPDH-forward              | AATGGGCAGCCGTTAGGAAA                                            |
| GAPDH-reverse              | GCGCCCAATACGACCAAATC                                            |

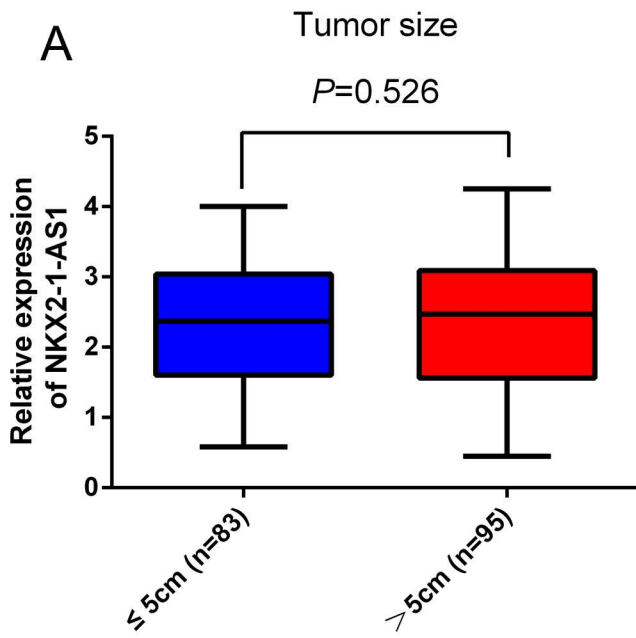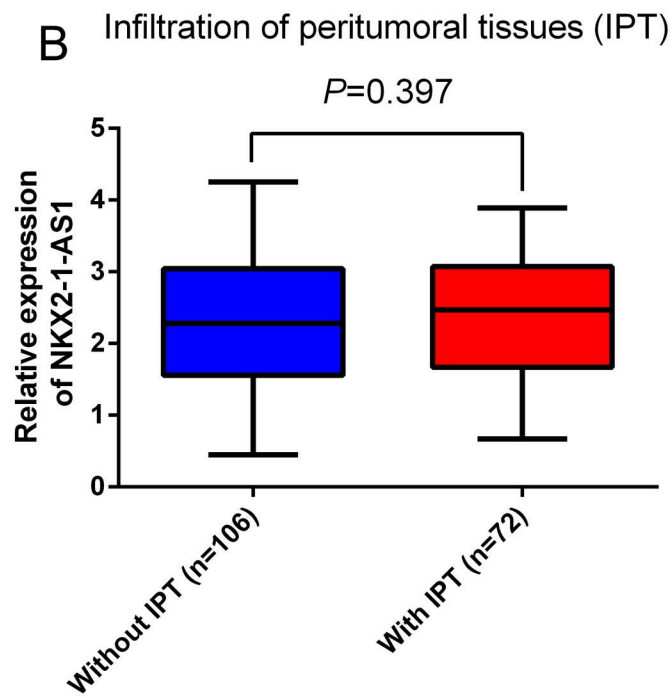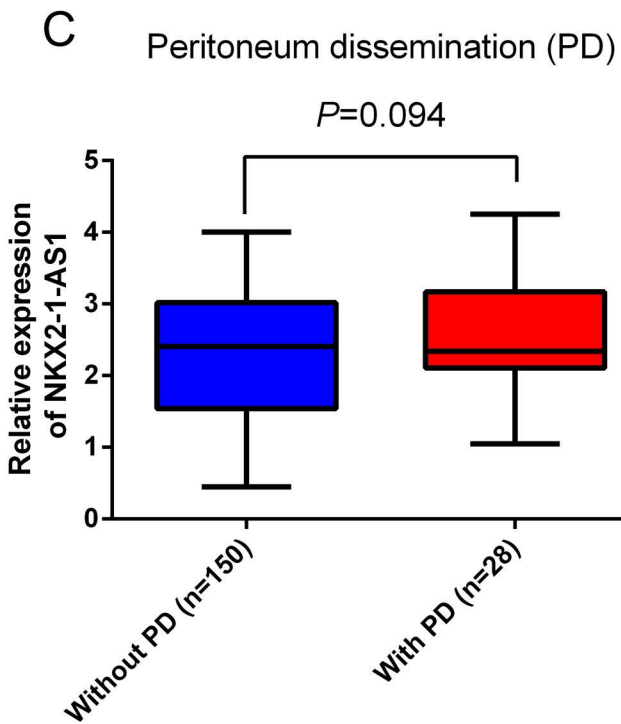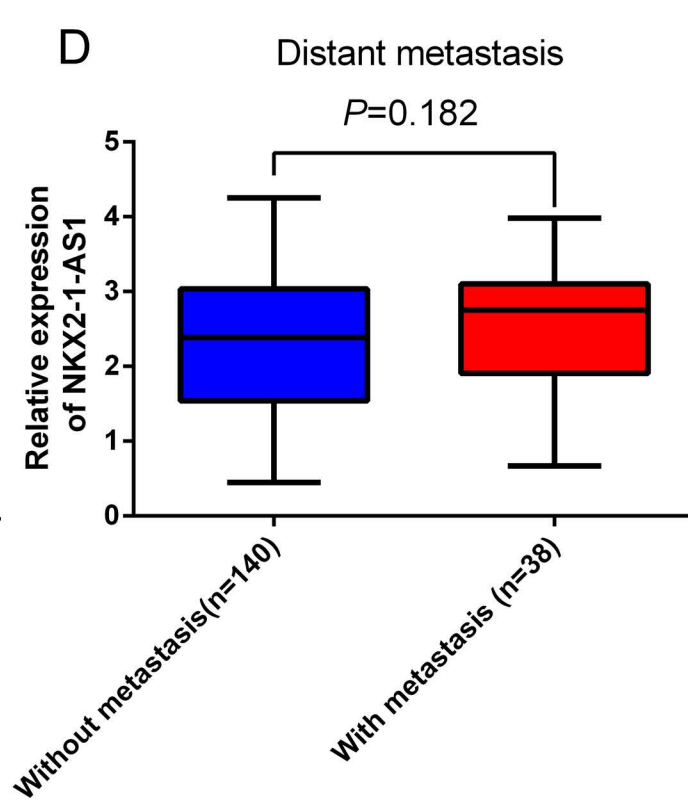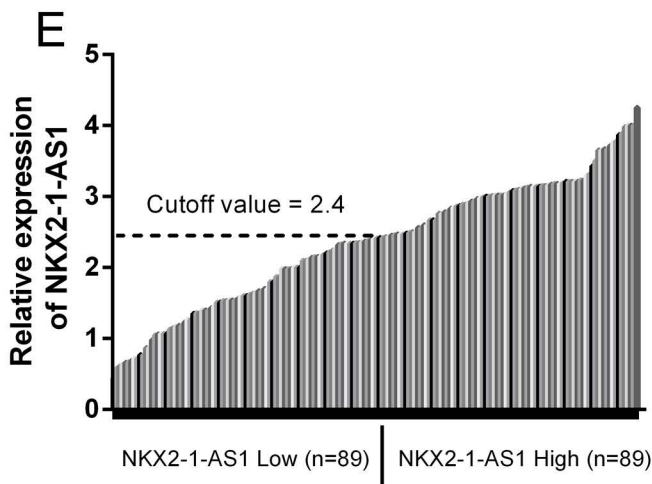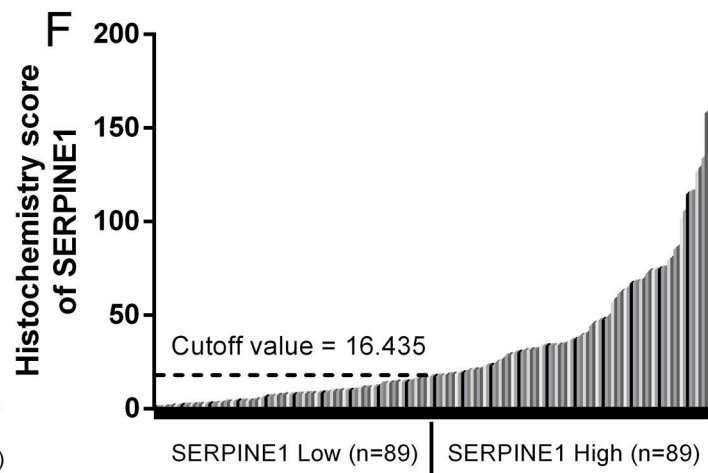

**Figure S1. Expression of NKX2-1-AS1 in GC patients from different clinical characteristics.** **A-D** Relative expression of NKX2-1-AS1 in GC patients with different tumor sizes, infiltration of peritumoral tissues (IPT), peritoneum dissemination (PD), and presence of distant metastasis. Results presented as the relative expression in tumor tissues relative to normal tissues. **E** qRT-PCR analysis of NKX2-1-AS1 expression in 178 GC tissues. The expression of NKX2-1-AS1 presented as the relative expression in tumor tissue to that of matched normal tissues. GC patients were divided into high NKX2-1-AS1 expression (n = 89) and low NKX2-1-AS1 expression (n = 89) groups based on the median value (0.50). **F** H-score of SERPINE1 expression in 178 GC cancer tissues. GC patients were divided into high SERPINE1 expression (n = 89) and low SERPINE1 expression (n = 89) groups based on the median value (0.50). The data shown are the *mean ± SD (error bars)*. \*P < 0.05, \*\*P < 0.01 and \*\*\*P < 0.001.

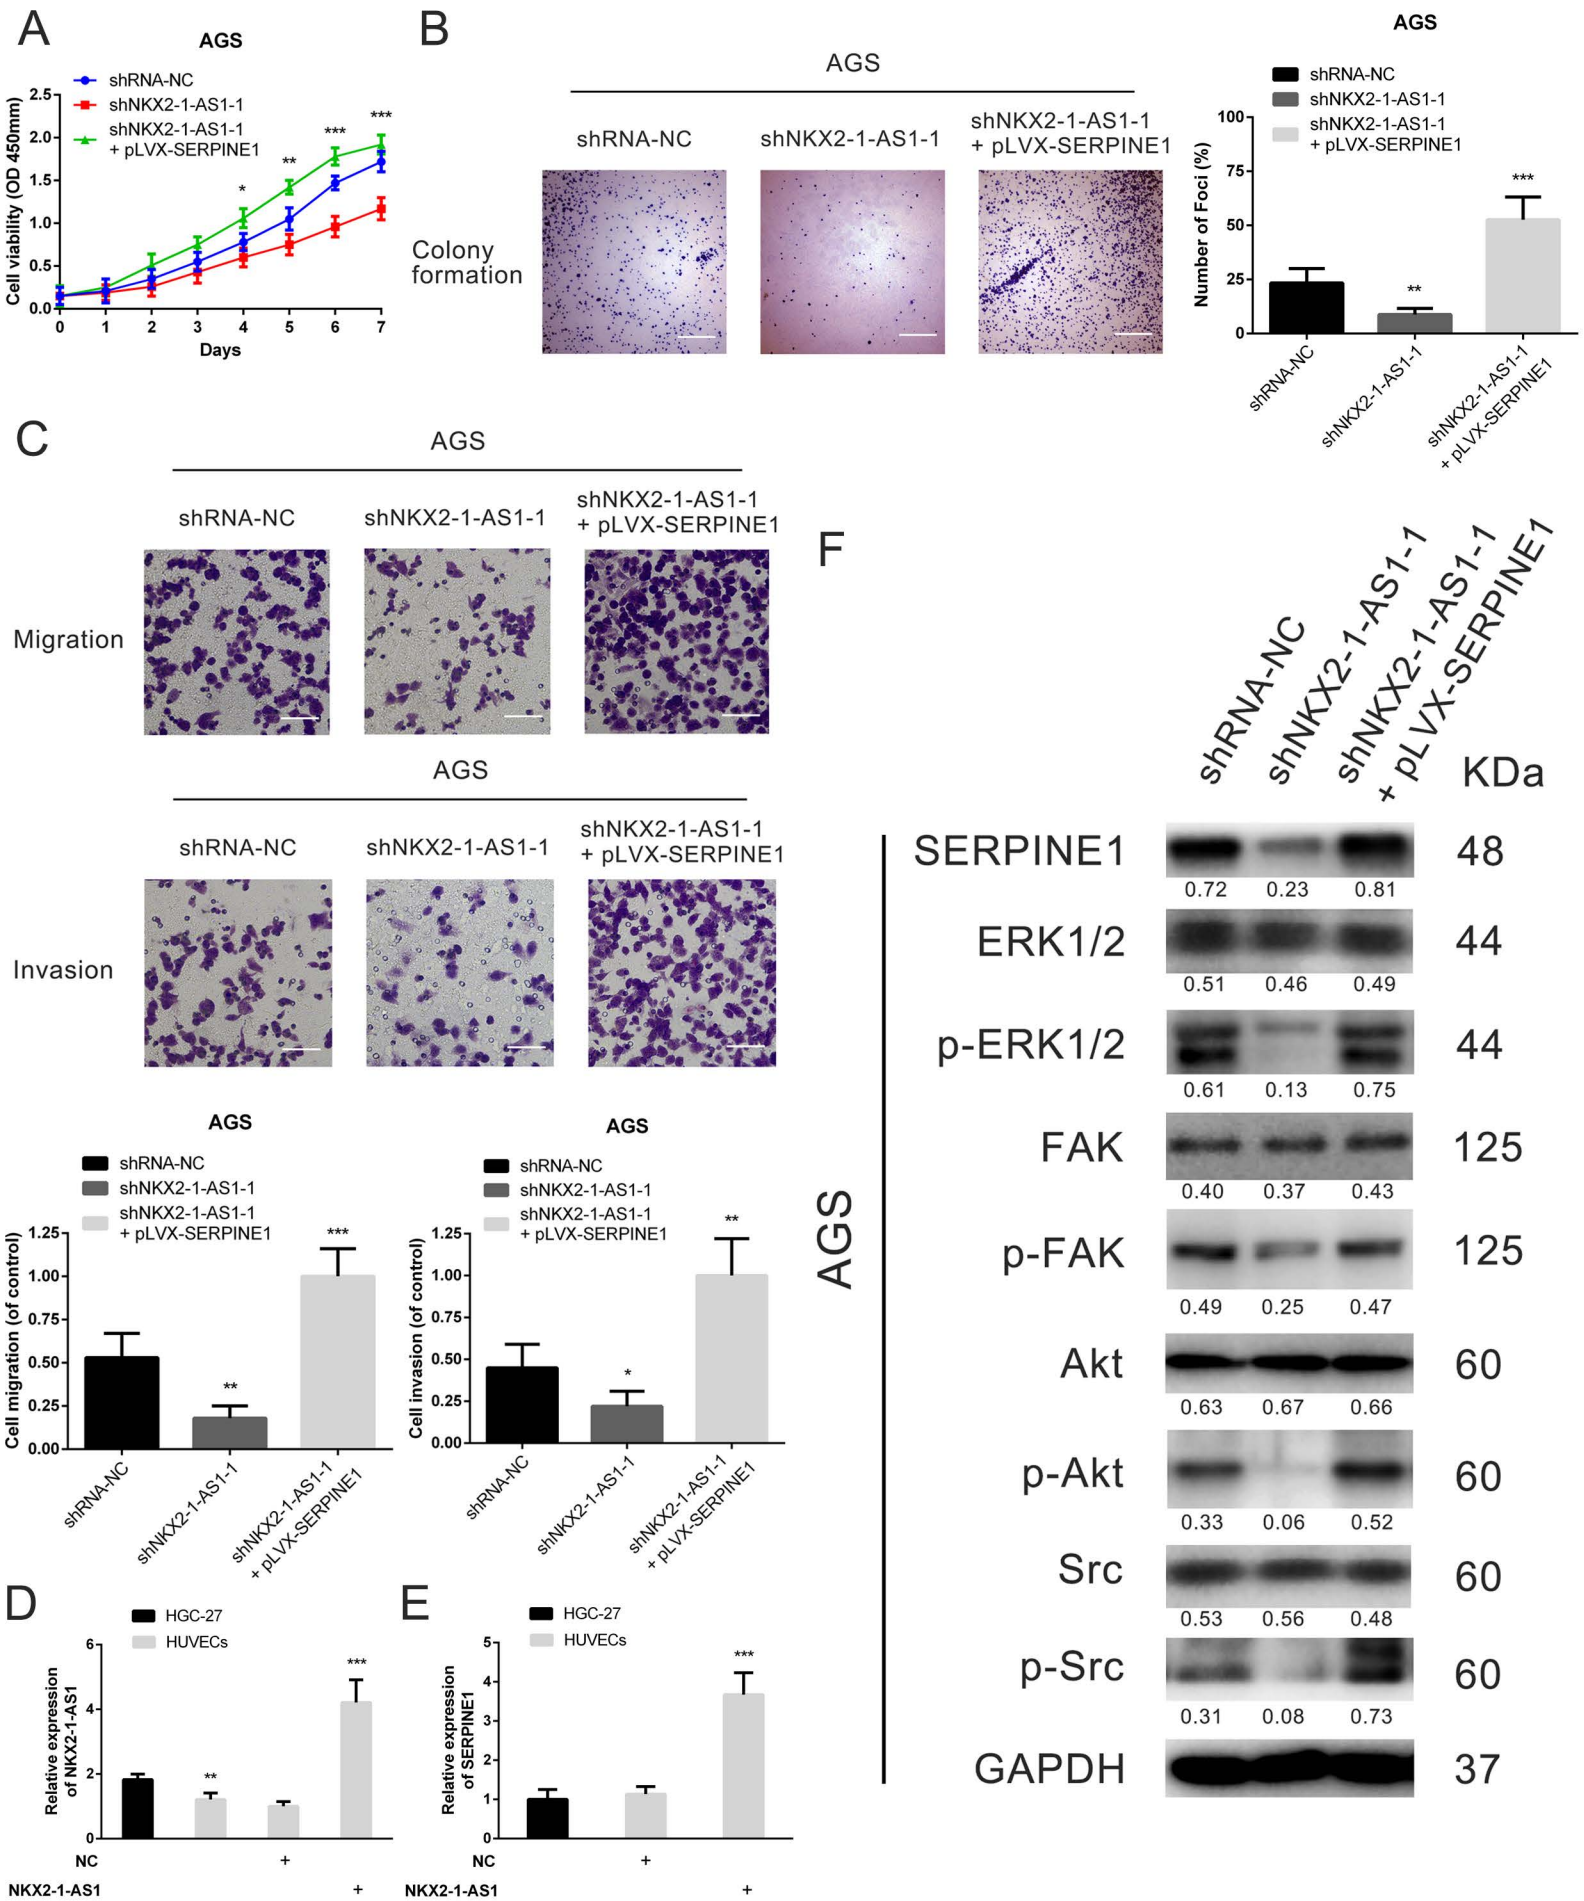

1 **Figure S2. The rescue of SERPINE1 expression in NKX2-1-AS1 knockdown GC**  
2 **cells is able to restore the function of cell growth, migration, invasion and activate**  
3 **VEGFR-2 signaling pathway. A** Cell proliferation assay in NKX2-1-AS1 knockdown  
4 AGS cells following rescue of SERPINE1 expression. **B-C** Representative images of  
5 the colony formation (scale bar = 500  $\mu$ m), transwell (scale bar = 50  $\mu$ m) in NKX2-1-  
6 AS1 knockdown AGS cells following rescue of SERPINE1 expression. **D-E** The  
7 NKX2-1-AS1 expression in HUVECs compared to HGC-27 cells. The relative  
8 expression of NKX2-1-AS1 and SERPINE1 in HUVECs with or without  
9 overexpression of NKX2-1-AS1. **F** Western blot assay was used to detect the  
10 expression of SERPINE1, Erk1/2, p-Erk1/2, FAK, p-FAK, Akt, p-Akt, Src and p-Src  
11 proteins in NKX2-1-AS1 knockdown AGS cells following rescue of SERPINE1  
12 expression. Numbers correspond to protein quantification, using GAPDH as a loading  
13 control. The data shown are the *mean  $\pm$  SD (error bars)*. \*P < 0.05, \*\*P < 0.01 and  
14 \*\*\*P < 0.001.

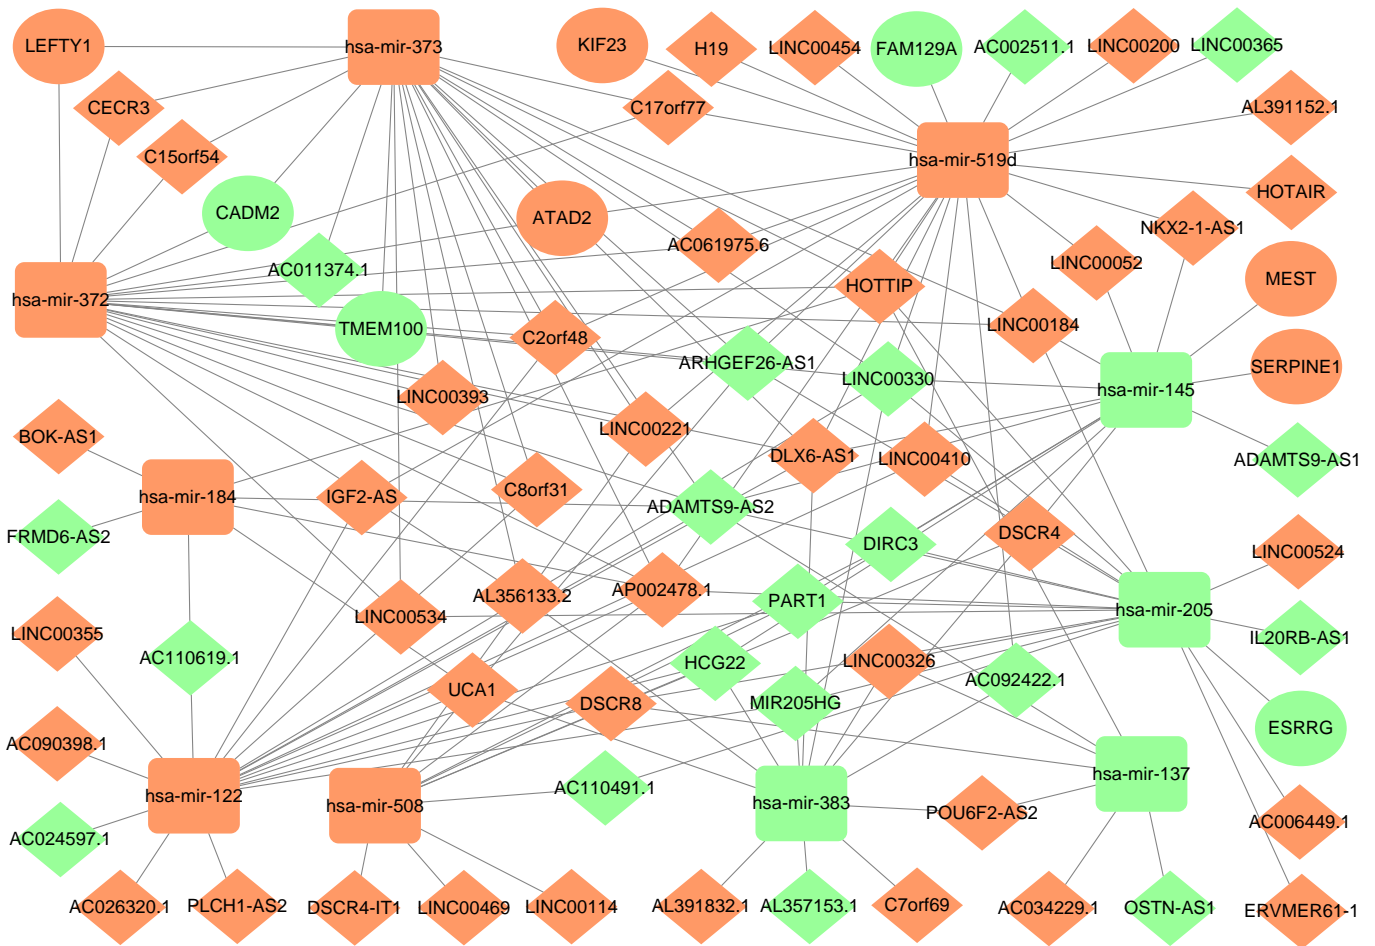

1 **Additional file 4: Figure S3. lncRNA-miRNA-mRNA ceRNA network.** Green  
2 squares indicate downregulated miRNAs; green circles indicate downregulated  
3 mRNAs; green diamonds indicate down-regulated lncRNAs. Orange squares indicate  
4 upregulated miRNAs; orange circles indicate upregulated mRNAs; orange diamonds  
5 indicate upregulated lncRNAs. The picture is the original version of Fig 1I, which has  
6 better readability.  
7
